# Supplementary material for: A Deviation from the Bipolar-Tetrapolar Mating Paradigm in an Early Diverged Basidiomycete
Source: PubMed Central journal article supplement (PMC2916851; doi:10.1371/journal.pgen.1001052), 2010-08-05
Supplement: pgen.1001052.s008.pdf [file pgen.1001052.s008.pdf]

**Table S1. List of *S. salmonicolor* and *S. johnsonii* strains used in this study and relevant information pertaining to them.**

| Species                           | Strain               | Sexuality <sup>a</sup><br>(mating tests) | STE3 alleles |                           | HD1/HD2 alleles |                                                | Source                                                                                                                            |
|-----------------------------------|----------------------|------------------------------------------|--------------|---------------------------|-----------------|------------------------------------------------|-----------------------------------------------------------------------------------------------------------------------------------|
|                                   |                      |                                          |              | GenBank accession numbers |                 | GenBank accession numbers                      |                                                                                                                                   |
| <i>Sporidiobolus salmonicolor</i> | CBS 1012             | A2                                       | STE3.A2      | HM133782                  | A2-16           | GU474649                                       | Leaf of <i>Aristolochia</i> sp., hot-house of Botanic Laboratory, Delft, Netherlands                                              |
|                                   | CBS 1013             | A2                                       | STE3.A2      |                           | A2-14           | GU474650                                       | Air in dairy, USA                                                                                                                 |
|                                   | CBS 1039             | A2                                       | STE3.A2      | HM133779                  | A2-14           | GU474651                                       | Air in dairy, USA                                                                                                                 |
|                                   | CBS 2635             | A2                                       | STE3.A2      |                           | A2-13           | GU474652                                       | Infected skin of a man, Germany                                                                                                   |
|                                   | CBS 2873             | A2                                       | STE3.A2      |                           | A2-15           | GU474653                                       | Extract of oak bark, France                                                                                                       |
|                                   | CBS 4030             | A2                                       | STE3.A2      |                           | A2-10           | GU474654                                       | Soil, New Zealand                                                                                                                 |
|                                   | CBS 487              | A2                                       | STE3.A2      |                           | A2-10           | GU474655                                       | Air, Japan (type strain of <i>Pseudomonilia rubiduncula</i> Okunuki)                                                              |
|                                   | CBS 490 <sup>T</sup> | A2                                       | STE3.A2      | GU474641                  | A2-10           | GU474656                                       | Culture contaminant (type strain of <i>Sporidiobolus salmonicolor</i> Fell & Statzell Tallman)                                    |
|                                   | CBS 495              | A2                                       | STE3.A2      |                           | A2-13           | GU474657                                       | Culture contaminant, Japan                                                                                                        |
|                                   | CBS 496              | A2                                       | STE3.A2      |                           | A2-10           | GU474658                                       | Scorched skin of orange, Delft, Netherlands                                                                                       |
|                                   | CBS 5937             | A2                                       | STE3.A2      |                           | A2-14           | GU474659                                       | Cariou dentine, South Africa (type strain of <i>Aessosporon salmonicolor</i> van der Walt)                                        |
|                                   | CBS 6322             | A2                                       | STE3.A2      | HM133783                  | A2-12           | GU474660                                       | Rotting wood shavings, Chile                                                                                                      |
|                                   | CBS 6470             | A2                                       | STE3.A2      |                           | A2-15           | GU474661                                       | Air, Germany                                                                                                                      |
|                                   | CBS 6530             | A2                                       | STE3.A2      | HM133780                  | A2-15           | GU474662                                       | Bog, locality unknown                                                                                                             |
|                                   | CBS 6781             | A2                                       | STE3.A2      |                           | A2-15           | GU474663                                       | Bituminous soil, oil field near Cumanà, Venezuela (type strain of <i>Sporidiobolus veronae</i> Balloni et. al.)                   |
|                                   | CBS 6832             | A2                                       | STE3.A2      | GU474646                  | A2-15           | GU474664                                       | Cerebro-spinal fluid, India (type of <i>Sporobolomyces salmonicolor</i> Kluyver & van Niel var. <i>fischeri</i> Misra & Randhawa) |
|                                   | CBS 7260             | A2                                       | STE3.A2      |                           | A2-13           | GU474665                                       | Slime flux of <i>Quercus pendunculata</i> , Russia (type strain of <i>Sporobolomyces philippovii</i> Krasil'nikov)                |
|                                   | PYCC 5245            | A2                                       | STE3.A2      |                           | A2-13           | GU474666                                       | Unknown substrate, Portugal                                                                                                       |
|                                   | RJB 8219             | A2                                       | STE3.A2      | HM133781                  | A2-15           | GU474667                                       | Isolated by R. J. Bandoni                                                                                                         |
|                                   | RJB 950              | A2                                       | STE3.A2      | HM133784                  | A2-11           | GU474668                                       | Isolated by R. J. Bandoni (deposited at CBS as <i>Sporobolomyces odorus</i> Derx)                                                 |
| ZP 392                            | A2                   | STE3.A2                                  | HM133778     | A2-10                     | GU474669        | Fruit body of <i>Dacrymyces</i> sp., Germany   |                                                                                                                                   |
| CBS 2647                          | A1                   | STE3.A1                                  | HM133773     | A1-2                      | GU474670        | Gut of <i>Drosophila</i> sp., locality unknown |                                                                                                                                   |

Table S1. Continued.

| Species                           | Strain                | Sexuality <sup>a</sup><br>(mating tests) | STE3 alleles       |                           | HD1/HD2 alleles |                           | Source                                                                                                                                      |
|-----------------------------------|-----------------------|------------------------------------------|--------------------|---------------------------|-----------------|---------------------------|---------------------------------------------------------------------------------------------------------------------------------------------|
|                                   |                       |                                          |                    | GenBank accession numbers |                 | GenBank accession numbers |                                                                                                                                             |
| <i>Sporidiobolus salmonicolor</i> | CBS 2648              | A1                                       | STE3.A1            |                           | A1-5            | GU474671                  | Exudate of <i>Kalopanax vicinifolium</i> var. <i>typicum</i> , isolated by K. Tubaki, Japan                                                 |
|                                   | CBS 4474              | A1                                       | STE3.A1            | HM133770                  | A1-5            | GU474672                  | Blistered skin of a man, Bonn, Germany                                                                                                      |
|                                   | CBS 483               | A1                                       | STE3.A1            | GU474642                  | A1-2            | GU474673                  | Rusted leaf of <i>Citrus</i> sp., France (type strain of <i>Sporobolomyces odor</i> Derx)                                                   |
|                                   | CBS 497               | A1                                       | STE3.A1            |                           | A1-4            | GU474674                  | Unknown (deposited at CBS as <i>Rhodomyces kochii</i> )                                                                                     |
|                                   | CBS 6529              | A1                                       | STE3.A1            |                           | A1-3            | GU474675                  | Culture contaminant, R.J. Bandoni                                                                                                           |
|                                   | IHMT 2446/96          | A1                                       | STE3.A1            | HM133771                  | A1-6            | GU474676                  | Skin lesion, Portugal                                                                                                                       |
|                                   | NRRL Y-17498          | A1                                       | STE3.A1            | HM133772                  | A1-3            | GU474677                  | Ice core, Greenland                                                                                                                         |
|                                   | ML 2241               | A1                                       | STE3.A1            | GU474643                  | A1-3            | GU474678                  | Isolated by J. W. Fell                                                                                                                      |
|                                   | PYCC 4558             | A1                                       | STE3.A1            | HM133774                  | A1-1            | GU474679                  | Polluted river water, Oeiras, Portugal                                                                                                      |
|                                   | PYCC 4623             | A1                                       | STE3.A1            |                           | A1-3            | GU474680                  | Soil, USSR                                                                                                                                  |
|                                   | RJB 948               | A1                                       | STE3.A1            |                           | A1-3            | GU474681                  | Isolated by R. J. Bandoni (deposited at CBS as <i>Sporobolomyces odor</i> Derx)                                                             |
|                                   | ZP 648                | A1                                       | STE3.A1            | HM133769                  | A1-4            | GU474682                  | Leaf of <i>Ligustrum</i> sp., Monte de Caparica, Portugal                                                                                   |
|                                   | CBS 2641              | AS                                       | STE3.A2            |                           | A2-10           | GU474683                  | Air, Netherlands                                                                                                                            |
| CBS 4029                          | AS                    | STE3.A2                                  |                    | A2-15                     | GU474684        | Soil, New Zealand         |                                                                                                                                             |
| <i>Sporidiobolus johnsonii</i>    | CBS 2634              | A2                                       | STE3.A2            | GU474647                  | A2-17           | GU474685                  | <i>Fragaria</i> sp., Japan (deposited at CBS as <i>Sporidiobolus johnsonii</i> Nyland)                                                      |
|                                   | CBS 2630              | A1                                       | STE3.A1            |                           | A1-9            | GU474686                  | Air, The Netherlands                                                                                                                        |
|                                   | CBS 2643              | A1                                       | STE3.A1            |                           | A1-9            | GU474687                  | Isolated by S. Windisch, Germany                                                                                                            |
|                                   | CBS 4209              | A1                                       | STE3.A1            | HM133776                  | A1-8            | GU474688                  | Fruit body of <i>Exidia</i> sp., Japan (type strain of <i>Sporobolomyces coralliformis</i> Tubaki)                                          |
|                                   | PYCC 4351             | A1                                       | STE3.A1            | GU474644                  | A1-9            | GU474689                  | Leaf of a tree, Portugal                                                                                                                    |
|                                   | CBS 1522              | AS                                       | STE3.A1            | HM133775                  | A1-9            | GU474690                  | Fodder yeast, Germany (type strain of <i>Sporobolomyces holsaticus</i> Windish)                                                             |
|                                   | CBS 7795              | AS                                       | STE3.A1            | HM133777                  | A1-7            | GU474691                  | Culture contaminant, isolated by W. I. Golubev, Russia                                                                                      |
|                                   | CBS 5470 <sup>T</sup> | SF                                       | STE3.A1<br>STE3.A2 | GU474645<br>GU474648      | A1/A2-18        | GU474692                  | Leaf of <i>Rubus idaeus</i> with dead pustule of <i>Phragmidium rubi-idaei</i> , USA (type strain of <i>Sporidiobolus johnsonii</i> Nyland) |
|                                   | CBS 8241              | SF                                       | STE3.A1<br>STE3.A2 |                           | A1/A2-18        | GU474693                  | Unknown                                                                                                                                     |

<sup>a</sup>The mating type designations (A1 or A2) were re-assigned to match the “molecular mating type” identified by PCR detection of the pheromone receptor alleles (*STE3.A1* or *STE3.A2*).
