# Supplementary material for: A Deviation from the Bipolar-Tetrapolar Mating Paradigm in an Early Diverged Basidiomycete
Source: PubMed Central journal article supplement (PMC2916851; doi:10.1371/journal.pgen.1001052), 2010-08-05
Supplement: pgen.1001052.s009.pdf [file pgen.1001052.s009.pdf]

**Table S2. List of primers, specific PCR conditions and restriction enzymes used for the RFLP analysis.**

| Primer Name  | Sequence (5' → 3')          | Annealing/ Extension | Purpose                                                                                                         | Restriction enzyme used in RFLP analysis |
|--------------|-----------------------------|----------------------|-----------------------------------------------------------------------------------------------------------------|------------------------------------------|
| <b>MC122</b> | TGGCGMGTYCCCGAACCYTACAAC    | 62.5°C / 3 min       | Amplify the complete <i>STE3.A2</i> allele in the type strain of <i>Ss</i> (CBS 490 <sup>T</sup> )              |                                          |
| <b>MC123</b> | AAAGGSTACGACCAGYTSCTCAAAYCT |                      |                                                                                                                 |                                          |
| <b>MC126</b> | AATRCCGCTCCGCTYACTGGCA      | 62°C / 90 s          |                                                                                                                 |                                          |
| <b>MC127</b> | TGTTCCGGTCTACAGGTTGGAGAG    |                      |                                                                                                                 |                                          |
| <b>MC103</b> | AGGATGTCGAGGACTTCTTCGGTGA   | 62 °C / 90 s         | Amplify the <b>HD1/HD2 region</b> in all the available strains of <i>Ss</i> and <i>Sj</i>                       | Rsa I                                    |
| <b>MC104</b> | CGGCGCGTGTGGTGAACCAGGT      |                      |                                                                                                                 |                                          |
| <b>MC053</b> | CATCTTCTTCCTCCTCCTGCC       | 60°C / 90 s          | Screening the <i>STE3.A1</i> and <i>STE3.A2</i> alleles in all the available strains of <i>Ss</i> and <i>Sj</i> |                                          |
| <b>MC054</b> | GGGTAGGGAGGAAGCGAGAT        |                      |                                                                                                                 |                                          |
| <b>MC126</b> | AATRCCGCTCCGCTYACTGGCA      | 62°C / 90 s          |                                                                                                                 |                                          |
| <b>MC127</b> | TGTTCCGGTCTACAGGTTGGAGAG    |                      |                                                                                                                 |                                          |
| <b>MC111</b> | CGCCGCTGGTTCCTTGRCAACTTCT   | 62°C / 90 s          | Amplify the C-terminal region of the <i>HD1</i> gene in selected <i>Ss</i> and <i>Sj</i> strains                |                                          |
| <b>MC112</b> | GCTGCCCATCTACGAGCAAGTCCC    |                      |                                                                                                                 |                                          |
| <b>MC147</b> | GARGACCTCGCSACCTACCC        | 60°C / 30 s          | Amplify part of the <i>PAN6</i> gene in <i>Ss</i>                                                               | Alu I                                    |
| <b>MC148</b> | AGGAKGAGMGCTTGYTGGATGT      |                      |                                                                                                                 |                                          |
| <b>MC045</b> | CGMGAAGACCTGAARCCGTT        | 56°C / 90 s          | Amplify part of the <i>STE20</i> gene in <i>Ss</i>                                                              | Eco RI                                   |
| <b>MC046</b> | CATGWACTCCATSACGACCCA       |                      |                                                                                                                 |                                          |
| <b>MC131</b> | CGAYATCRCCRAAACAGCTGAGGAT   | 59°C / 90 s          | Amplify part of the <i>KAP95</i> gene in <i>Ss</i>                                                              |                                          |
| <b>MC132</b> | TACAACGARCTCCARGTCAACATCT   |                      |                                                                                                                 |                                          |
| <b>MC133</b> | ACCTCAGCAAGTACGTYGACAAGAA   | 59°C / 90 s          | Amplify part of the <i>LSm7</i> gene in <i>Ss</i>                                                               | Rsa I                                    |
| <b>MC134</b> | AAAGGGTTTGCAATTTCKCMGAC     |                      |                                                                                                                 |                                          |
| <b>MC135</b> | GAGAAGGAGCCKCARCCCAA        | 56°C / 90 s          | Amplify part of the <i>RibL18</i> gene in <i>Ss</i>                                                             | Kpn I                                    |
| <b>MC136</b> | ACATCAAGCAGCTCCTCACCC       |                      |                                                                                                                 |                                          |
| <b>MC137</b> | GACTTCCCRGGYCACTAYCCC       | 59°C / 90 s          | Amplify part of the <i>RNAPOL</i> gene in <i>Ss</i>                                                             |                                          |
| <b>MC138</b> | CCTGTCKCKCKGCATCTT          |                      |                                                                                                                 |                                          |
| <b>MC141</b> | CTACATGTTCAAGTACGACTCGAC    | 59°C / 90 s          | Amplify part of the <i>GPD</i> gene in <i>Ss</i>                                                                | Stu I                                    |
| <b>MC142</b> | GTACCACGAGAAGAGCTTGACGAA    |                      |                                                                                                                 |                                          |
| <b>MC139</b> | TCGATCCTCATGGAGCAYTTCATCT   | 59°C / 90 s          | Amplify part of the <i>MIP</i> gene in <i>Ss</i>                                                                |                                          |
| <b>MC140</b> | CCAYTTGCCMACYTCTTCCATC      |                      |                                                                                                                 |                                          |
| <b>MC157</b> | GTCTTGACGACCGGGTTCAACGA     | 59°C / 90 s          | Amplify part of the <i>IsocL</i> gene in <i>Ss</i>                                                              | Bam HI                                   |
| <b>MC158</b> | GGCAWTCCCKCTCGGTAGTGGTA     |                      |                                                                                                                 |                                          |
| <b>MC155</b> | TCAACMTCTCTCYGGCAAGTC       | 59°C / 90 s          | Amplify part of the <i>NGP1 (NOG2)</i> gene in <i>Ss</i>                                                        |                                          |
| <b>MC156</b> | GAGTTRTTGATGGAGGCGTGAA      |                      |                                                                                                                 |                                          |
| <b>MC149</b> | CTGGACARGAGACGTACAATGC      | 59°C / 90 s          | Amplify part of the <i>AKOR2</i> gene in <i>Ss</i>                                                              | Rsa I                                    |
| <b>MC150</b> | TCTCGAGCRTGAARTCAAAGACGTT   |                      |                                                                                                                 |                                          |
| <b>MC151</b> | CTGAACCGMTACACCTTTGCC       | 59°C / 1 min         | Amplify part of the <i>RPB2</i> gene in <i>Ss</i>                                                               |                                          |
| <b>MC152</b> | TGAATCTCGCAATGWGTCCAAG      |                      |                                                                                                                 |                                          |

***S. salmonicolor* (Ss); *S. johnsonii* (Sj)**

Table S2. Continued.

| Primer Name                  | Sequence (5' → 3')                                 | Annealing/<br>Extension | Purpose                                           | Restriction enzyme used in RFLP analysis |
|------------------------------|----------------------------------------------------|-------------------------|---------------------------------------------------|------------------------------------------|
| <b>MC170</b><br><b>MC171</b> | TATCTACGGCGCTGGTTGCTTGA<br>TCCAGATCATCGAGCGGTCCTTG | 60 °C / 90 s            | Amplify part of the <i>sdhA</i> gene in <i>Ss</i> |                                          |
| <b>MC047</b><br><b>MC048</b> | ACCAACCTYTGCYTCRGTCTGA<br>GATGACCTCGTCSGGYGTACKGTA | 63 °C / 90 s            | Amplify part of the <i>URA3</i> gene in <i>Ss</i> |                                          |
| <b>MC172</b><br><b>MC173</b> | GCCAGTCCCTCATCACCTCG<br>TCCTTGAGCCTGAAGCAGTCG      | 60°C / 90 s             | Amplify part of the <i>HXT1</i> gene in <i>Ss</i> |                                          |
| <b>MC174</b><br><b>MC175</b> | GACCAGCAGTTCTTGCCGA<br>GAGCTTGACAACTCGTCGTGAAC     | 60°C / 90 s             | Amplify part of the <i>aldA</i> gene in <i>Ss</i> |                                          |
| <b>MC176</b><br><b>MC177</b> | AGCGTTGCGTTCCTCCAGTC<br>GTTCTTGCGACCTCGATCTG       | 60°C / 90 s             | Amplify part of the <i>PAL</i> gene in <i>Ss</i>  |                                          |
| <b>MC178</b><br><b>MC179</b> | CTCATCATCGTCGACTCTGTAC<br>GGCGAGTCGACGATCTTGG      | 60°C / 60 s             | Amplify part of the <i>DMC1</i> gene in <i>Ss</i> | Msp I                                    |
| <b>MC180</b><br><b>MC181</b> | GCCGTCTACCGAATCAACAAG<br>CTGCATCTGGAGCTTGCAATT     | 57°C / 90 s             | Amplify part of the <i>GEF1</i> gene in <i>Ss</i> |                                          |
| <b>MC182</b><br><b>MC183</b> | CCCATCCTGAATGTCAACTACAA<br>GGTGACAAGAACCGAGTAGCG   | 58°C / 90 s             | Amplify part of the <i>LACC</i> gene in <i>Ss</i> |                                          |
| <b>MC186</b><br><b>MC187</b> | CAAGTGCCTGTGCAAGAA<br>CATAAGCCATGTACGGTTT          | 51°C / 60 s             | Amplify part of the <i>RAN1</i> gene in <i>Ss</i> | Hinf I                                   |

*S. salmonicolor* (*Ss*); *S. johnsonii* (*Sj*)
