# Supplementary material for: A Deviation from the Bipolar-Tetrapolar Mating Paradigm in an Early Diverged Basidiomycete
Source: PubMed Central journal article supplement (PMC2916851; doi:10.1371/journal.pgen.1001052), 2010-08-05
Supplement: pgen.1001052.s010.pdf [file pgen.1001052.s010.pdf]

Table S3. NCBI Trace Archives sequences used in this study.

| <b><i>Rhodospiridium babjevae</i></b>                                                       |                              |
|---------------------------------------------------------------------------------------------|------------------------------|
| <b>STE3.A2</b><br>(includes the 5'-end of LSm7 and 3'-end of RibL6 putative flanking genes) |                              |
| tij                                                                                         | 2154151284 name:FUHB15613.g1 |
| tij                                                                                         | 2195334063 name:FVAF22906.b1 |
| tij                                                                                         | 2195327270 name:FVAF17973.g1 |
| tij                                                                                         | 2154446490 name:FVAG21685.b1 |
| tij                                                                                         | 2154537287 name:FVAG43948.b1 |
| tij                                                                                         | 2154452092 name:FVAG24486.b1 |
| tij                                                                                         | 2154291912 name:FUHB42794.g1 |
| tij                                                                                         | 2154443469 name:FVAG20174.g1 |
| <b><i>Sporidiobolus salmonicolor</i></b>                                                    |                              |
| <b>HD1/HD2 region</b>                                                                       |                              |
| tij                                                                                         | 1244034137 name:BAUG63963.g1 |
| tij                                                                                         | 1243919455 name:BAUG5057.g1  |
| tij                                                                                         | 1244020867 name:BAUG56453.b1 |
| tij                                                                                         | 1243931890 name:BAUG10196.g1 |
| tij                                                                                         | 1243965174 name:BAUG37624.g1 |
| tij                                                                                         | 1244003711 name:BAUG55425.b1 |
| tij                                                                                         | 1243998420 name:BAUG42358.g1 |
| tij                                                                                         | 1244025540 name:BAUG59590.g1 |
| tij                                                                                         | 1244020332 name:BAUG49966.b1 |
| tij                                                                                         | 1243943891 name:BAUG16629.b1 |
| tij                                                                                         | 1243937469 name:BAUG10687.g1 |
| tij                                                                                         | 1243958334 name:BAUG25600.b1 |
| tij                                                                                         | 1244003699 name:BAUG55413.b1 |
| tij                                                                                         | 1243967269 name:BAUG34439.g1 |
| tij                                                                                         | 1243996862 name:BAUG45312.b1 |
| tij                                                                                         | 1244031458 name:BAUG63684.g1 |
| tij                                                                                         | 1243974274 name:BAUG32324.g1 |
| tij                                                                                         | 1243951950 name:BAUG19696.b1 |
| tij                                                                                         | 1243993653 name:BAUG42295.b1 |
| <b>Partial sequence of the <i>RPO41</i> gene</b><br>(Putative DNA-dependent RNA polymerase) |                              |
| tij                                                                                         | 1243937005 name:BAUG11471.b1 |
| tij                                                                                         | 1243946449 name:BAUG18899.b1 |
| tij                                                                                         | 1243925713 name:BAUG9587.g1  |
| tij                                                                                         | 1244026558 name:BAUG59648.g1 |
| tij                                                                                         | 1243980948 name:BAUG37078.b1 |
| tij                                                                                         | 1244022107 name:BAUG60765.b1 |
| tij                                                                                         | 1243999058 name:BAUG38580.g1 |
| tij                                                                                         | 1244030807 name:BAUG63417.b1 |
| <b>Partial sequence of the <i>PAN6</i> gene</b><br>(Putative pantoate-beta-alanine ligase)  |                              |
| tij                                                                                         | 1243999491 name:BAUG39589.b1 |
| tij                                                                                         | 1243944265 name:BAUG18155.g1 |
| tij                                                                                         | 1243939898 name:BAUG15996.b1 |
| tij                                                                                         | 1244024936 name:BAUG62826.g1 |
| tij                                                                                         | 1243921720 name:BAUG5210.b1  |

|                                                                                                                    |                              |
|--------------------------------------------------------------------------------------------------------------------|------------------------------|
| <b>Partial sequence of the <i>STE20</i> gene</b><br>(Putative p21-activated protein kinase)                        |                              |
| tij                                                                                                                | 1243947537 name:BAUG24979.g1 |
| tij                                                                                                                | 1243983780 name:BAUG45862.b1 |
| tij                                                                                                                | 1244033153 name:BAUG61059.b1 |
| tij                                                                                                                | 1243931275 name:BAUG14477.g1 |
| tij                                                                                                                | 1243964000 name:BAUG19266.b1 |
| tij                                                                                                                | 1244010134 name:BAUG51096.b1 |
| tij                                                                                                                | 1244008391 name:BAUG52617.b1 |
| tij                                                                                                                | 1244012976 name:BAUG51538.g1 |
| tij                                                                                                                | 1243932804 name:BAUG11782.g1 |
| tij                                                                                                                | 1244008568 name:BAUG52794.b1 |
| tij                                                                                                                | 1243986237 name:BAUG46207.g1 |
| tij                                                                                                                | 1243931275 name:BAUG14477.g1 |
| <b>Partial sequence of the <i>KAP95</i> gene</b><br>(Putative Karyopherin $\beta$ 1 - importin)                    |                              |
| tij                                                                                                                | 1243914633 name:BAUG2422.x1  |
| tij                                                                                                                | 1243945047 name:BAUG18361.g1 |
| tij                                                                                                                | 1244013243 name:BAUG52477.b1 |
| tij                                                                                                                | 1244003594 name:BAUG55308.b1 |
| tij                                                                                                                | 1243947825 name:BAUG24979.b1 |
| tij                                                                                                                | 1244019354 name:BAUG53116.g1 |
| tij                                                                                                                | 1244010118 name:BAUG51080.b1 |
| tij                                                                                                                | 1244023708 name:BAUG62750.b1 |
| tij                                                                                                                | 1243943827 name:BAUG18773.b1 |
| tij                                                                                                                | 1244005440 name:BAUG49762.b1 |
| <b>Partial sequence of the <i>LSm7</i> gene</b><br>(Putative small nuclear ribonucleoprotein)                      |                              |
| tij                                                                                                                | 1243966515 name:BAUG34933.b1 |
| tij                                                                                                                | 1244006137 name:BAUG55067.b1 |
| tij                                                                                                                | 1244019455 name:BAUG53217.g1 |
| tij                                                                                                                | 1244006358 name:BAUG55288.b1 |
| tij                                                                                                                | 1243968129 name:BAUG36451.g1 |
| tij                                                                                                                | 1244035821 name:BAUG58639.g1 |
| <b>Partial sequence of the <i>RibL18</i> gene</b><br>(Putative Ribosomal L18ae protein)                            |                              |
| tij                                                                                                                | 1244029876 name:BAUG59030.g1 |
| tij                                                                                                                | 1244027010 name:BAUG60100.b1 |
| tij                                                                                                                | 1243938823 name:BAUG14825.b4 |
| tij                                                                                                                | 1244024596 name:BAUG61718.b1 |
| <b>Partial sequence of the <i>RNAPOL</i> gene</b><br>(Putative DNA directed RNA polymerase III, 30/40 KDa subunit) |                              |
| tij                                                                                                                | 1243928029 name:BAUG8159.b1  |
| tij                                                                                                                | 1244017874 name:BAUG56436.b5 |
| tij                                                                                                                | 1243938919 name:BAUG14825.g2 |
| tij                                                                                                                | 1244027106 name:BAUG60100.g1 |
| tij                                                                                                                | 1244002511 name:BAUG47217.g1 |
| <b>Partial sequence of the <i>GPD</i> gene</b><br>(Putative glyceraldehyde-3-phosphate dehydrogenase – GAPDH)      |                              |
| tij                                                                                                                | 1244012762 name:BAUG53916.b1 |
| tij                                                                                                                | 1243987204 name:BAUG43814.b1 |
| tij                                                                                                                | 1243961274 name:BAUG24220.b1 |

Table S3. Continued.

| <b>Partial sequence of the <i>MIP</i> gene</b><br>(Putative mitochondrial intermediate peptidase)    |                              |
|------------------------------------------------------------------------------------------------------|------------------------------|
| tij                                                                                                  | 1243979024 name:BAUG29298.g1 |
| tij                                                                                                  | 1243946492 name:BAUG18942.b1 |
| tij                                                                                                  | 1243993537 name:BAUG42179.g1 |
| tij                                                                                                  | 1244034662 name:BAUG64392.b1 |
| tij                                                                                                  | 1244008528 name:BAUG52754.b1 |
| tij                                                                                                  | 1243938225 name:BAUG11059.g1 |
| tij                                                                                                  | 1243918485 name:BAUG1303.y1  |
| tij                                                                                                  | 1243959176 name:BAUG22218.b1 |
| tij                                                                                                  | 1243964071 name:BAUG19337.b1 |
| <b>Partial sequence of <i>IsocL</i> gene</b><br>(Putative isocitrate lyase)                          |                              |
| tij                                                                                                  | 1244032592 name:BAUG59346.g1 |
| tij                                                                                                  | 1243913568 name:BAUG1741.x1  |
| tij                                                                                                  | 1243931944 name:BAUG10250.g1 |
| tij                                                                                                  | 1243952262 name:BAUG19816.g1 |
| tij                                                                                                  | 1243963834 name:BAUG20636.b1 |
| tij                                                                                                  | 1243965732 name:BAUG38182.g2 |
| tij                                                                                                  | 1243981027 name:BAUG37061.g1 |
| tij                                                                                                  | 1243971150 name:BAUG29488.b2 |
| <b>Partial sequence of the <i>NGP1 (NOG2)</i> gene</b><br>(Putative Nucleolar GTP-binding protein 2) |                              |
| tij                                                                                                  | 1243932700 name:BAUG11678.g1 |
| tij                                                                                                  | 1244009264 name:BAUG57426.b1 |
| tij                                                                                                  | 1244000123 name:BAUG39933.b1 |
| tij                                                                                                  | 1243941162 name:BAUG17164.b1 |
| tij                                                                                                  | 1244019186 name:BAUG52180.g2 |
| tij                                                                                                  | 1243984108 name:BAUG45710.g1 |
| tij                                                                                                  | 1243948626 name:BAUG24724.b1 |
| tij                                                                                                  | 1244029720 name:BAUG58970.b1 |
| tij                                                                                                  | 1243918656 name:BAUG1474.y1  |
| tij                                                                                                  | 1244014951 name:BAUG53321.b1 |
| tij                                                                                                  | 1243966796 name:BAUG33966.b1 |
| tij                                                                                                  | 1243966495 name:BAUG34913.b1 |
| tij                                                                                                  | 1243933163 name:BAUG12429.b1 |
| tij                                                                                                  | 1244034658 name:BAUG64388.b1 |
| tij                                                                                                  | 1243921840 name:BAUG5330.b1  |
| <b>Partial sequence of the <i>AKOR2</i> gene</b><br>(Putative aldo-keto reductase)                   |                              |
| tij                                                                                                  | 1244016242 name:BAUG56724.g1 |
| tij                                                                                                  | 1243951077 name:BAUG20935.b1 |
| tij                                                                                                  | 1243949884 name:BAUG28574.b1 |
| tij                                                                                                  | 1244024160 name:BAUG57922.g1 |
| tij                                                                                                  | 1244021707 name:BAUG48845.b1 |
| tij                                                                                                  | 1244024160 name:BAUG57922.g1 |
| tij                                                                                                  | 1243966759 name:BAUG33929.b1 |
| tij                                                                                                  | 1243913061 name:BAUG1233.x1  |
| tij                                                                                                  | 1243949884 name:BAUG28574.b1 |

| <b>Partial sequence of the <i>RPB2</i> gene</b><br>(Putative RNA polymerase II second largest subunit)     |                              |
|------------------------------------------------------------------------------------------------------------|------------------------------|
| tij                                                                                                        | 1243971757 name:BAUG32111.g1 |
| tij                                                                                                        | 1244020882 name:BAUG56468.b1 |
| tij                                                                                                        | 1243983637 name:BAUG45719.b1 |
| tij                                                                                                        | 1243920596 name:BAUG3510.g1  |
| tij                                                                                                        | 1243971149 name:BAUG29487.b2 |
| tij                                                                                                        | 1243965032 name:BAUG37578.b1 |
| tij                                                                                                        | 1243961708 name:BAUG22830.g1 |
| tij                                                                                                        | 1244035646 name:BAUG58464.g1 |
| tij                                                                                                        | 1243917934 name:BAUG6120.x1  |
| tij                                                                                                        | 1243920588 name:BAUG3502.g1  |
| tij                                                                                                        | 1243922988 name:BAUG8878.b1  |
| tij                                                                                                        | 1243938766 name:BAUG14768.g2 |
| tij                                                                                                        | 1243961708 name:BAUG22830.g1 |
| <b>“Autosomal” markers – <i>S. salmonicolor</i></b>                                                        |                              |
| <b>Partial sequence of the <i>sdhA</i> gene</b><br>(Putative succinate dehydrogenase flavoprotein subunit) |                              |
| tij                                                                                                        | 1243932965 name:BAUG12327.b1 |
| tij                                                                                                        | 1243949976 name:BAUG28570.g1 |
| tij                                                                                                        | 1244011373 name:BAUG57519.g1 |
| tij                                                                                                        | 1243982038 name:BAUG29912.b1 |
| tij                                                                                                        | 1244024325 name:BAUG60967.g1 |
| <b>Partial sequence of the <i>URA3</i> gene</b><br>(orotidine 5'-phosphate decarboxylase)                  |                              |
| tij                                                                                                        | 1244022690 name:BAUG61732.g1 |
| tij                                                                                                        | 1244004916 name:BAUG55766.g1 |
| tij                                                                                                        | 1243996898 name:BAUG44964.g1 |
| tij                                                                                                        | 1243942104 name:BAUG17626.b1 |
| tij                                                                                                        | 1243939980 name:BAUG15982.g1 |
| tij                                                                                                        | 1243942104 name:BAUG17626.b1 |
| tij                                                                                                        | 1244011207 name:BAUG57353.g1 |
| <b>Partial sequence of the <i>HXT1</i> gene</b><br>(putative hexose transporter)                           |                              |
| tij                                                                                                        | 1243923129 name:BAUG8923.g1  |
| tij                                                                                                        | 1243923641 name:BAUG9147.g1  |
| tij                                                                                                        | 1244007487 name:BAUG48257.b1 |
| tij                                                                                                        | 1243978746 name:BAUG37660.g1 |
| tij                                                                                                        | 1244008309 name:BAUG49847.g1 |
| tij                                                                                                        | 1243932413 name:BAUG11391.g1 |
| tij                                                                                                        | 1244025679 name:BAUG59729.b1 |
| tij                                                                                                        | 1244028271 name:BAUG62513.b2 |
| tij                                                                                                        | 1243928371 name:BAUG9653.b1  |
| tij                                                                                                        | 1243949421 name:BAUG24847.b1 |
| tij                                                                                                        | 1243981984 name:BAUG29858.b1 |
| tij                                                                                                        | 1244014361 name:BAUG54075.g1 |
| tij                                                                                                        | 1243923622 name:BAUG9128.g1  |
| tij                                                                                                        | 1243953511 name:BAUG23465.g1 |
| tij                                                                                                        | 1243935956 name:BAUG14166.g1 |
| tij                                                                                                        | 1243943748 name:BAUG18694.b1 |
| tij                                                                                                        | 1244021128 name:BAUG56714.b1 |
| tij                                                                                                        | 1243914662 name:BAUG2451.x1  |
| tij                                                                                                        | 1243923263 name:BAUG8961.g1  |
| tij                                                                                                        | 1244019696 name:BAUG53650.b1 |
| tij                                                                                                        | 1243916660 name:BAUG4840.y1  |
| tij                                                                                                        | 1243927197 name:BAUG7711.g1  |

Table S3. Continued.

| Partial sequence of the <i>RAN1</i> gene<br>(putative protein serine/ threonine kinase) |                   |
|-----------------------------------------------------------------------------------------|-------------------|
| tij  1243988647                                                                         | name:BAUG46505.b1 |
| tij  1244016377                                                                         | name:BAUG48987.b1 |
| tij  1244006386                                                                         | name:BAUG55796.g1 |
| tij  1244005972                                                                         | name:BAUG52982.g1 |
| tij  1243915389                                                                         | name:BAUG2796.x1  |
| tij  1243988647                                                                         | name:BAUG46505.b1 |
| Partial sequence of the <i>aldA</i> gene<br>(putative NAD-aldehyde dehydrogenase)       |                   |
| tij  1244020809                                                                         | name:BAUG56203.b2 |
| tij  1244016587                                                                         | name:BAUG51021.g1 |
| tij  1243935797                                                                         | name:BAUG14103.g1 |
| tij  1243978923                                                                         | name:BAUG29197.g1 |
| tij  1243958883                                                                         | name:BAUG21445.b1 |
| tij  1243988822                                                                         | name:BAUG46584.b1 |
| tij  1243930459                                                                         | name:BAUG12893.g1 |
| tij  1244032672                                                                         | name:BAUG59426.b1 |
| tij  1244033401                                                                         | name:BAUG61211.b1 |
| tij  1244014959                                                                         | name:BAUG53329.b1 |
| tij  1243978923                                                                         | name:BAUG29197.g1 |
| tij  1243986112                                                                         | name:BAUG46178.b1 |
| tij  1244010416                                                                         | name:BAUG51282.b1 |
| tij  1243964402                                                                         | name:BAUG20436.g1 |
| tij  1244032672                                                                         | name:BAUG59426.b1 |
| tij  1244033401                                                                         | name:BAUG61211.b1 |
| tij  1244014959                                                                         | name:BAUG53329.b1 |
| tij  1243978923                                                                         | name:BAUG29197.g1 |
| tij  1243986112                                                                         | name:BAUG46178.b1 |
| tij  1244010416                                                                         | name:BAUG51282.b1 |
| tij  1243964402                                                                         | name:BAUG20436.g1 |
| Partial sequence of the <i>PAL</i> gene<br>(putative NAD-aldehyde dehydrogenase)        |                   |
| tij  1244023897                                                                         | name:BAUG62939.b1 |
| tij  1243917414                                                                         | name:BAUG5594.y1  |
| tij  1244028263                                                                         | name:BAUG62505.b2 |
| tij  1243999288                                                                         | name:BAUG38714.b1 |
| tij  1243988576                                                                         | name:BAUG45666.b1 |
| tij  1243941753                                                                         | name:BAUG15739.g1 |
| tij  1243997975                                                                         | name:BAUG39225.g1 |
| tij  1243979468                                                                         | name:BAUG29742.b1 |
| Partial sequence of the <i>DMC1</i> gene<br>(putative meiosis-specific recombinase )    |                   |
| tij  1244026568                                                                         | name:BAUG59658.g1 |
| tij  1243954225                                                                         | name:BAUG23891.g1 |
| tij  1244015333                                                                         | name:BAUG50055.g1 |
| tij  1244030098                                                                         | name:BAUG58388.b1 |
| Partial sequence of the <i>GEF1</i> gene<br>(putative phenylalanine ammonia-lyase)      |                   |
| tij  1243992869                                                                         | name:BAUG42087.b1 |
| tij  1243919507                                                                         | name:BAUG5109.g1  |
| tij  1243920956                                                                         | name:BAUG6942.g1  |
| tij  1243975744                                                                         | name:BAUG33506.g1 |
| tij  1243981595                                                                         | name:BAUG30237.b1 |
| tij  1243982772                                                                         | name:BAUG29782.g1 |
| tij  1244026095                                                                         | name:BAUG60337.g1 |
| tij  1243982553                                                                         | name:BAUG30715.g1 |

| Partial sequence of the <i>LACC</i> gene<br>(putative laccase protein) |                   |
|------------------------------------------------------------------------|-------------------|
| tij  1244008544                                                        | name:BAUG52770.b1 |
| tij  1243941934                                                        | name:BAUG17456.b1 |
| tij  1243992777                                                        | name:BAUG41995.g1 |
| tij  1243956635                                                        | name:BAUG27165.b1 |
| tij  1244018080                                                        | name:BAUG50306.g1 |
| tij  1243928557                                                        | name:BAUG12047.b1 |
| tij  1244013399                                                        | name:BAUG53785.g1 |
| tij  1243954711                                                        | name:BAUG24185.b1 |

| <i>Rhodospiridium babjevae</i> |                   |
|--------------------------------|-------------------|
| HD1-HD2                        |                   |
| tij  2154331804                | name:FwAF8985.g1  |
| tij  2154456123                | name:FwAG26501.g1 |
| tij  2154540940                | name:FwAG45774.g1 |
| tij  2154229020                | name:FUHB29492.b1 |
| tij  2195319826                | name:FwAF13483.g1 |
| tij  2154235755                | name:FUHB32859.g1 |
| tij  2195334783                | name:FwAF24034.b1 |
| tij  2154503699                | name:FwAG36226.b1 |
| tij  2195316925                | name:FwAF12033.b1 |
| tij  2154229021                | name:FUHB29492.g1 |
| tij  2154430327                | name:FwAG18979.b1 |
| tij  2195318461                | name:FwAF12801.b1 |
| tij  2154533013                | name:FwAG41811.b1 |
| tij  2154534672                | name:FwAG42640.g1 |
| tij  2154333225                | name:FwAF994.b1   |
| tij  2195322807                | name:FwAF15742.b1 |
| tij  2195332082                | name:FwAF20763.g1 |
| tij  2154197503                | name:FUHB28724.g1 |
| tij  2154499347                | name:FwAG34050.b1 |
| tij  2195335759                | name:FwAF24522.b1 |
| tij  2154197502                | name:FUHB28724.b1 |
| tij  2154447297                | name:FwAG22088.g1 |
| tij  2154500783                | name:FwAG34768.b1 |
| tij  2154233232                | name:FUHB31598.b1 |
| tij  2154419698                | name:FwAG13664.g1 |
| tij  2154326269                | name:FwAF647.b1   |
| tij  2154367586                | name:FwAG1711.b1  |
| tij  2154430851                | name:FwAG9641.b1  |
| tij  2154233233                | name:FUHB31598.g1 |
| tij  2154343709                | name:FwAF10244.g1 |
| tij  2154368702                | name:FwAG2269.b1  |
| tij  2154321820                | name:FwAF4447.g1  |
| tij  2154418949                | name:FwAG13290.b1 |
